# Supplementary material
Source: PubMed Central journal article supplement (PMC11029127)
Supplement: 262_2014_1595_MOESM1_ESM.pdf [file 262_2014_1595_MOESM1_ESM.pdf]

**Supplemental Table** Peptides used in the multiplex assay. The peptide name represents the coding gene and the -1 and -2 shift, respectively in brackets. The peptide sequences comprise five amino acids of the wild type gene-derived amino acid sequence followed by the frameshift neopeptide sequence (underlined) translated from -1 and -2 deletions in the respective microsatellite-containing genes and C-terminal FLAG epitope (in italic). Peptides of over 40 amino acid length are split into two to four (A to D) overlapping peptides

| Peptide name          | Peptide sequence                                           |
|-----------------------|------------------------------------------------------------|
| FLAG                  | <i>DYKDDDDK</i>                                            |
| FLJ32202(-1)          | KKKKK <u>KEKKS</u> LLISFFLISTEQGSKIDYKDDDDK                |
| FLJ32202(-2)          | KKKKK <u>RNPS</u> DYKDDDDK                                 |
| DAMS(-1)              | PPPPP <u>KAPAG</u> QETLSLQSRDYKDDDDK                       |
| DAMS(-2)              | PPPPP <u>KLQLV</u> RKHCLYNQDKHLAQGVQPFLTYRLADYKDDDDK       |
| BANP(-1)              | FFFFF <u>CSVGA</u> DYKDDDDK                                |
| BANP(-2)              | PCFFF <u>SLFSA</u> L DYKDDDDK                              |
| HT001(ASTE)(-1)       | NSKKK <u>GRRNR</u> IPAVLRTEGEPLHTPSVGMRETTGLGCDYKDDDDK     |
| HT001(ASTE)(-2)       | NSKKK <u>AEETE</u> YQLFDYKDDDDK                            |
| TAF1B(-1)             | GLKKK <u>TILKK</u> AGIGMCVKVSSIFFINKQKPDYKDDDDK            |
| TAF1B(-2)             | GLKKK <u>QY</u> DYKDDDDK                                   |
| FLJ25378(-1)          | SFFFF <u>KQSPK</u> TQDHLRQORASARDYKDDDDK                   |
| FLJ25378(-2)_A        | PSFFF <u>SSSPV</u> PRRKTTCASSVHQODSKSRTRAARKTSTWPDYKDDDDK  |
| FLJ25378(-2)_B        | ARKTSTW <u>PEDT</u> YPGRKTCTPEDRERGHVLRSSHVRLGHFDYKDDDDK   |
| FLJ25378(-2)_C        | SHVRL <u>GHFLF</u> TEDYKTPVLSLGLADAILGLSPPAARRSLKQDYKDDDDK |
| FLJ25378(-2)_D        | AARR <u>SLQHV</u> APHRLVLFVGPTLWARTNTSTFOAVYSSVSDYKDDDDK   |
| PTHL3(PTHLH)(-1)      | GLKKK <u>RKTTE</u> EHHCNDYKDDDDK                           |
| PTHL3(PTHLH)(-2)      | GLKKK <u>GKQOK</u> NTSYATNDLIIDYKDDDDK                     |
| ZNF294(-1)            | SSKKK <u>MVRLD</u> LLMRYLKAIKRMKNVYLQKERRLKAGNDYKDDDDK     |
| ZNF294(-2)            | SSKKK <u>W</u> DYKDDDDK                                    |
| TGFBR2(-1)            | MKEKK <u>SLVRL</u> SSCVVALMSAMTTSSSQKNITPAILTCCDYKDDDDK    |
| TGFBR2(-2)            | MKEKK <u>A</u> W DYKDDDDK                                  |
| MARCKS(-1)            | TPKKK <u>KRS</u> AFPSRSLSSDYKDDDDK                         |
| MARCKS(-2)            | TPKKK <u>EALFL</u> QEVFQAERLLLQEEQEGGWRRRDYKDDDDK          |
| Q96PS6(-1)            | IFFFK <u>DGVLL</u> SHLGDYKDDDDK                            |
| Q96PS6(-2)            | PIFFF <u>SKMES</u> YSLTDYKDDDDK                            |
| SLC22A9(UST3)(-1)_A   | AAQKK <u>NLLC</u> VKSTCPTTYVKGSPSCPLRDLQTLWPILADYKDDDDK    |
| SLC22A9(UST3)(-1)_B   | QTLWP <u>ILALIS</u> MSSIWGTMFSCRLSLVQSSSWPTVLHLGHDYKDDDDK  |
| SLC22A9(UST3)(-2)     | AAQKK <u>TFS</u> V DYKDDDDK                                |
| ACVR2(-1)             | VVHKK <u>RGLF</u> DYKDDDDK                                 |
| ACVR2(-2)             | VHKKE <u>ACFKR</u> LLAETCWNGNALDYKDDDDK                    |
| ADAMTSL1(C9orf94)(-1) | FCFFF <u>S</u> SDYKDDDDK                                   |
| ADAMTSL1(C9orf94)(-2) | FCFFF <u>LPRS</u> ADYKDDDDK                                |
